# Supplementary material
Source: MDPI journal article supplement (https://www.mdpi.com/2227-7080/6/3/77)
Supplement: s1 [file s1]

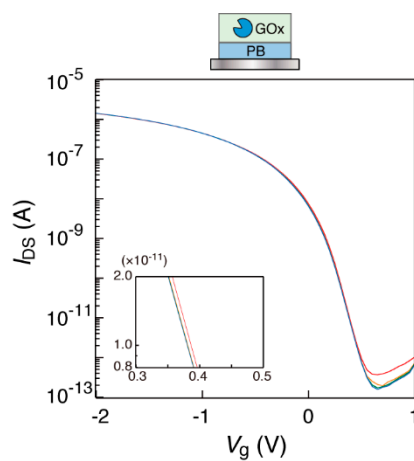

**Figure S1.** Transfer characteristic curves of the organic field-effect transistor (OFET) biosensor with a GOx-PB electrode in a buffer solution (1× PBS) at 25°C. Scan times = 4. The inset shows the enlarged view.
